# Supplementary material for: Proteome alterations associated with transformation of multiple myeloma to secondary plasma cell leukemia
Source: PubMed Central journal article supplement (PMC5386695; doi:10.18632/oncotarget.14294), 2016-12-27
Supplement: oncotarget-08-19427-s001.pdf [file oncotarget-08-19427-s001.pdf]

## **Proteome alterations associated with transformation of multiple myeloma to secondary plasma cell leukemia**

### **SUPPLEMENTARY FIGURES**

**Supplementary Table 1: Complete list of pairwise correlation coefficients and P-values for the global expression patterns in the super-SILAC library.**

**See Supplementary File 1**

**Supplementary Table 2: Summarized MaxQuant report for sPCL versus multiple myeloma.**

**See Supplementary File 2**
